# Supplementary material
Source: MDPI journal article supplement (https://www.mdpi.com/2072-4292/9/3/278)
Supplement: s1 [file s1]

# Supplementary Materials: UAV-Based Oblique Photogrammetry for Outdoor Data Acquisition and Offsite Visual Inspection of Transmission Line

San Jiang, Wanshou Jiang\*, Wei Huang and Liang Yang

This supplementary file illustrates image orientation and 3D reconstruction results of power pylons and lines. Four typical tests are presented, where both urban and rural areas, high voltage and low voltage transmission lines have been considered. All reconstructed models have been loaded into a GIS platform for the purpose of indoor inspection.

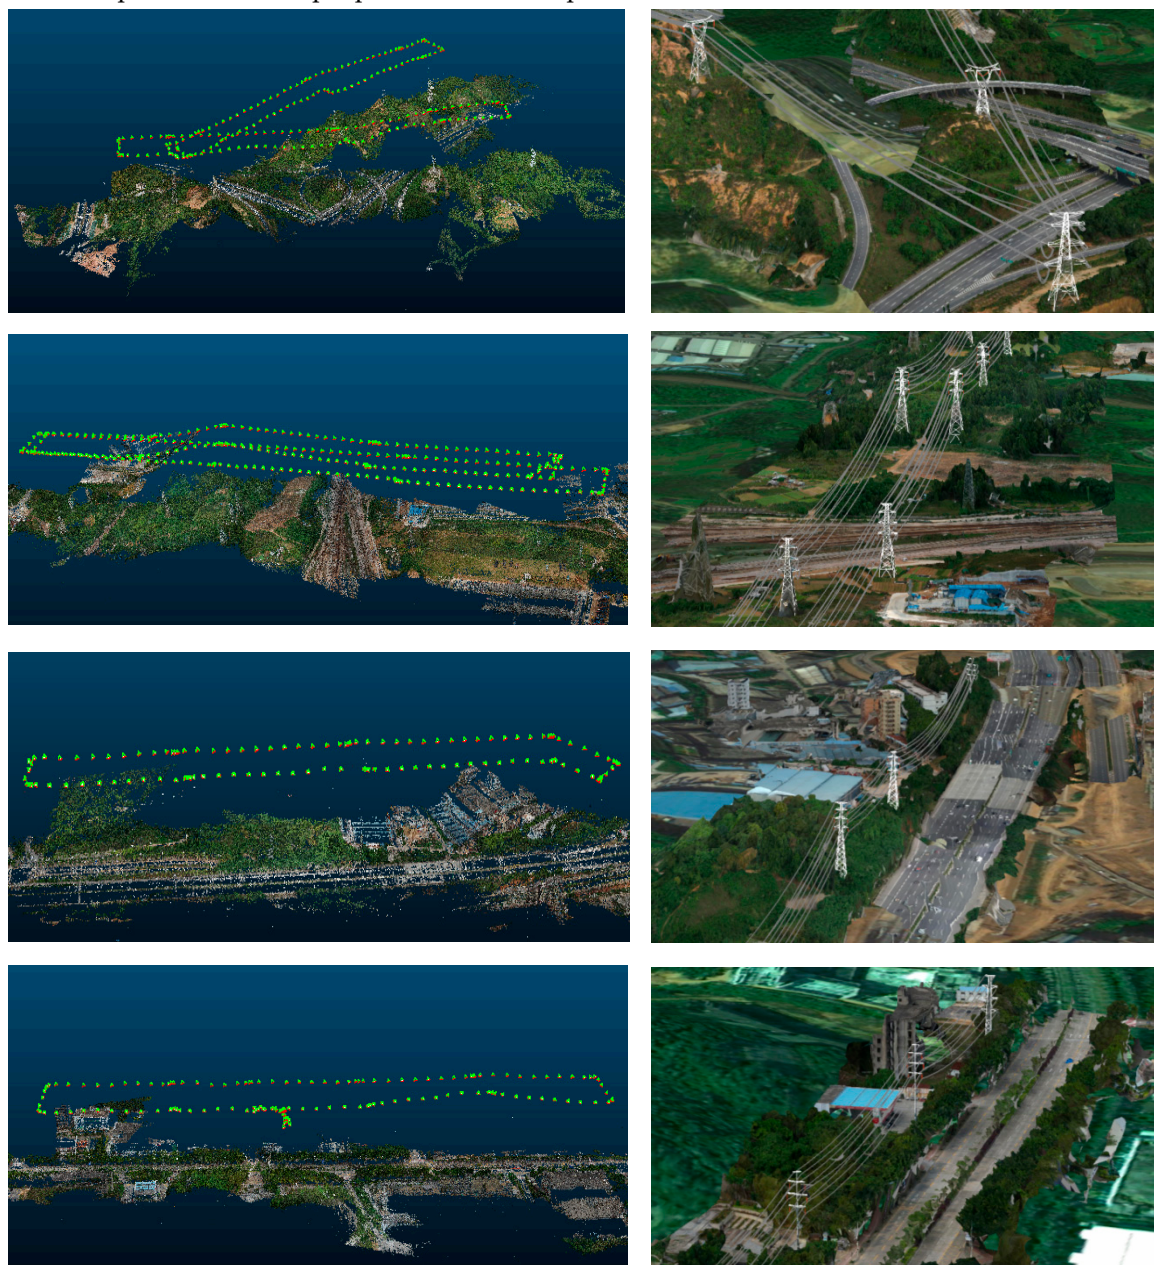

**Figure S1.** Image orientation and 3D reconstruction of power pylons and lines of some test sites.

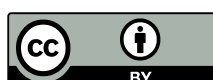

© 2017 by the authors; licensee MDPI, Basel, Switzerland. This article is an open access article distributed under the terms and conditions of the Creative Commons Attribution (CC-BY) license (<http://creativecommons.org/licenses/by/4.0/>).
